# Supplementary material for: An Updated Modeling Framework to Simulate Los Angeles Air Quality. Part 1: Model Development, Evaluation, and Source Apportionment
Source: Copernicus journal article supplement (doi:10.5194/egusphere-2023-749), 2023-05-03
Supplement: Supplementary file 1 [file egusphere-2023-749-supplement.pdf]

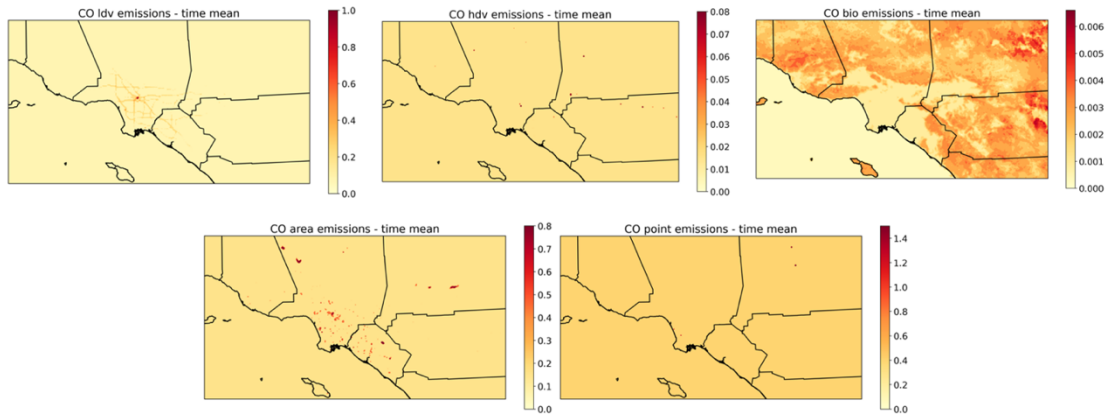

20  
 21 Figure S2: Time-averaged (April 1–30, 2020) emission rate (tons/day) of CO from a) light duty  
 22 on-road vehicles, b) heavy duty on-road vehicles, c) biogenic, d) area, and e) point sources.

23

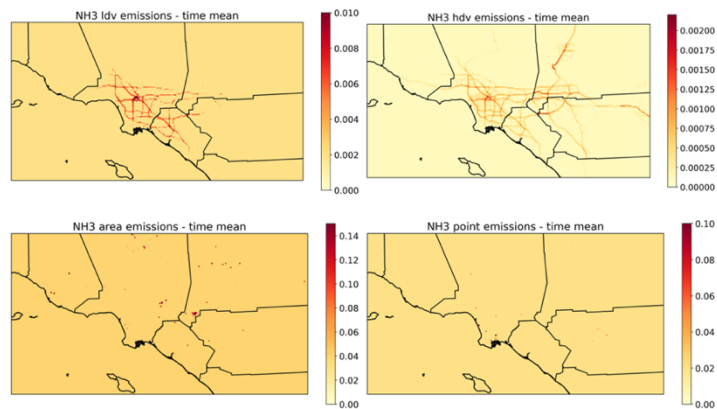

24  
 25 Figure S3: Time-averaged (April 1–30, 2020) emission rate (tons/day) of NH<sub>3</sub> from a) light duty  
 26 on-road vehicles, b) heavy duty on-road vehicles, c) area, and d) point sources.

27

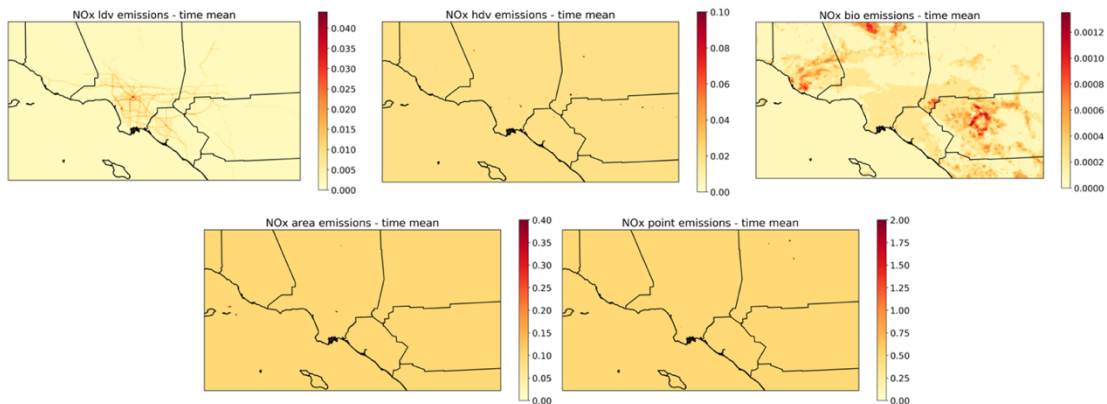

28  
 29 Figure S4: Time-averaged (April 1–30, 2020) emission rate (tons/day) of NO<sub>x</sub> from a) light duty  
 30 on-road vehicles, b) heavy duty on-road vehicles, c) biogenic, d) area, and e) point sources.

31

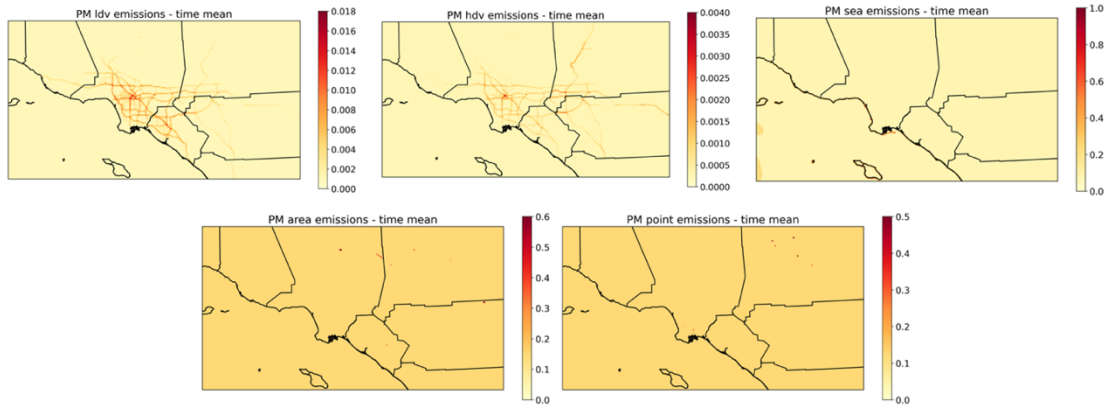

32  
33  
34  
35

Figure S5: Time-averaged (April 1–30, 2020) emission rate (tons/day) of PM from a) light duty on-road vehicles, b) heavy duty on-road vehicles, c) sea spray, d) area, and e) point sources.

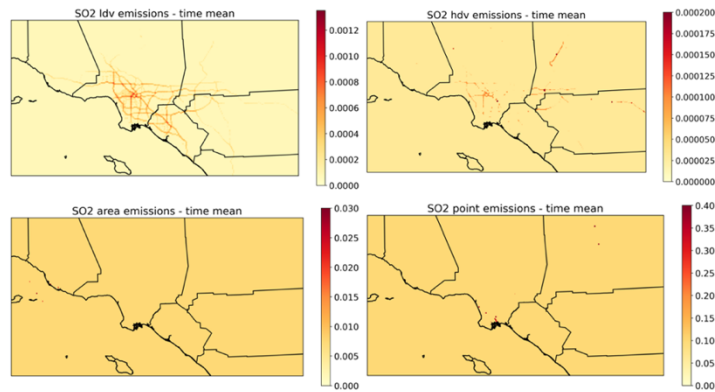

36  
37  
38  
39

Figure S6: Time-averaged (April 1–30, 2020) emission rate (tons/day) of SO<sub>2</sub> from a) light duty on-road vehicles, b) heavy duty on-road vehicles, c) area, and d) point sources.

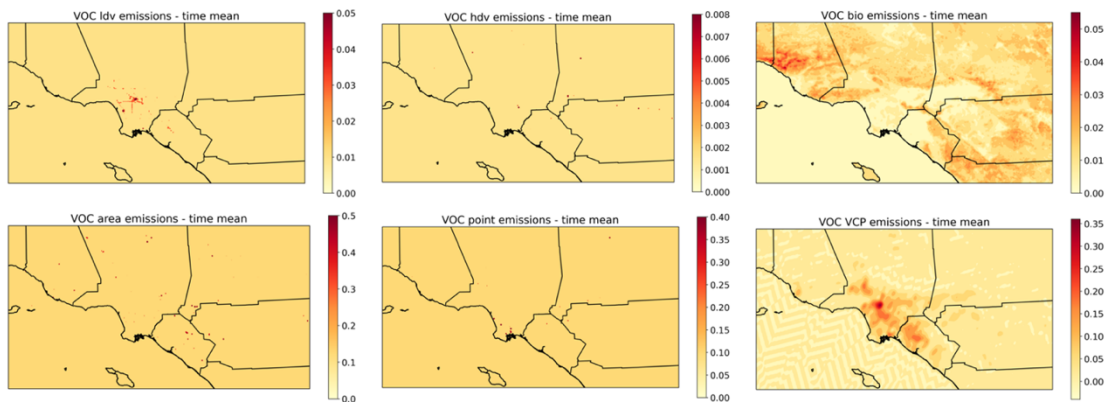

40  
41  
42  
43

Figure S7: Time-averaged (April 1–30, 2020) emission rate (tons/day) of VOCs from a) light duty on-road vehicles, b) heavy duty on-road vehicles, c) biogenic, d) area, e) point, and f) VCP sources.

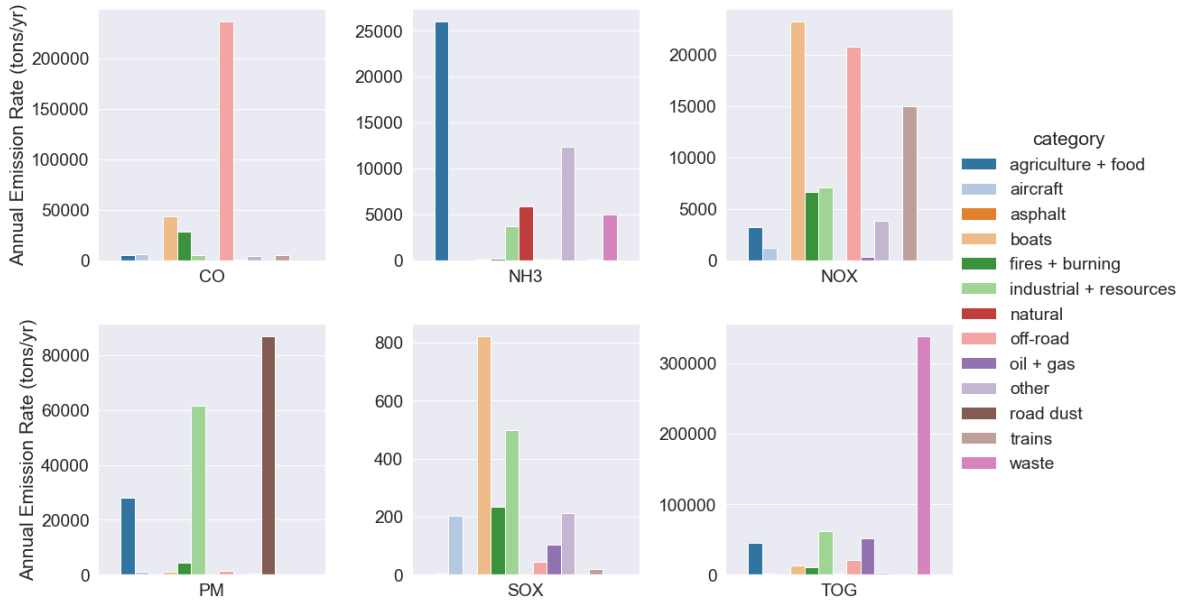

44  
45  
46  
47  
48

Figure S8: Annual emission rates of pollutants in CARB area source emissions inventory.

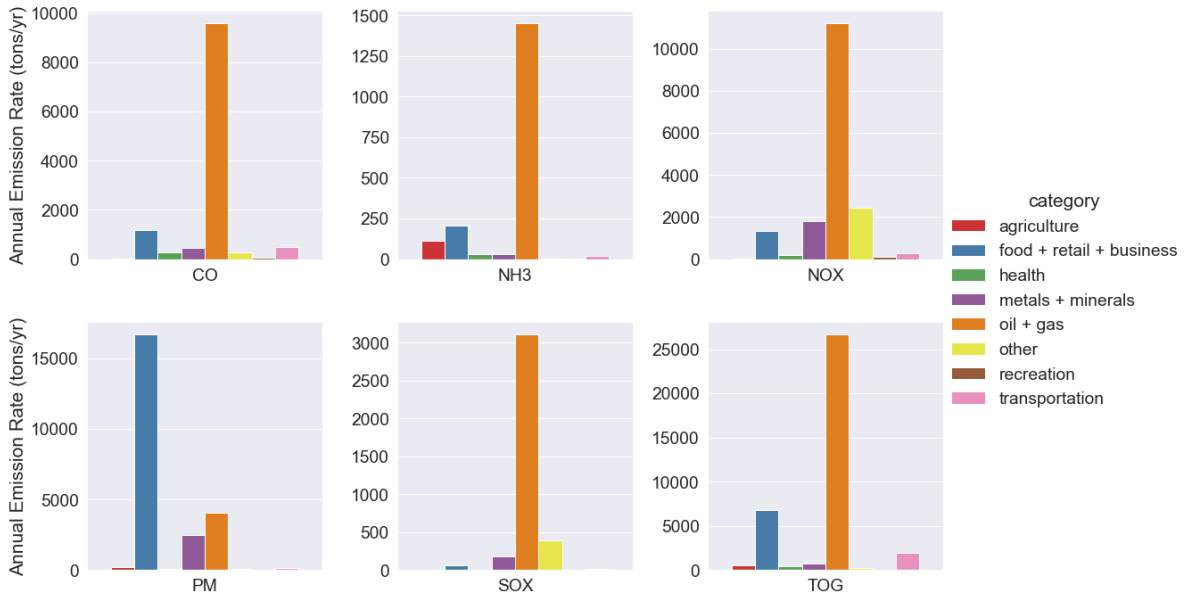

49  
50  
51

Figure S9: Annual emission rates of pollutants in CARB point source emissions inventory.

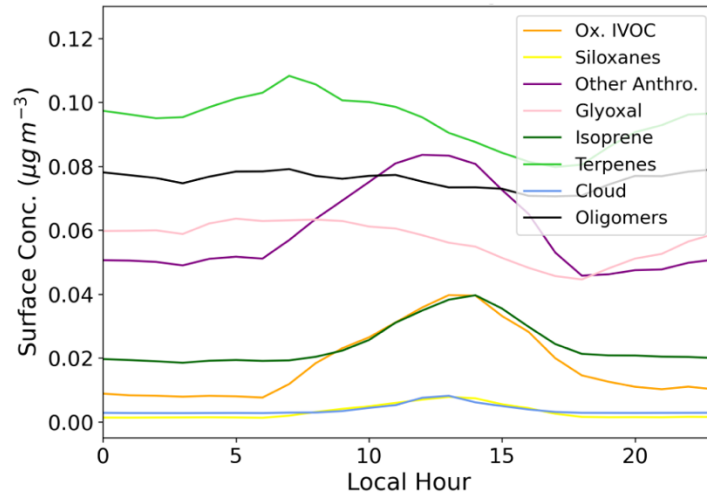

52  
53  
54  
55

Figure S10: Same as Figure 8C with POA, alkane-like IVOCs, and organic nitrates removed.

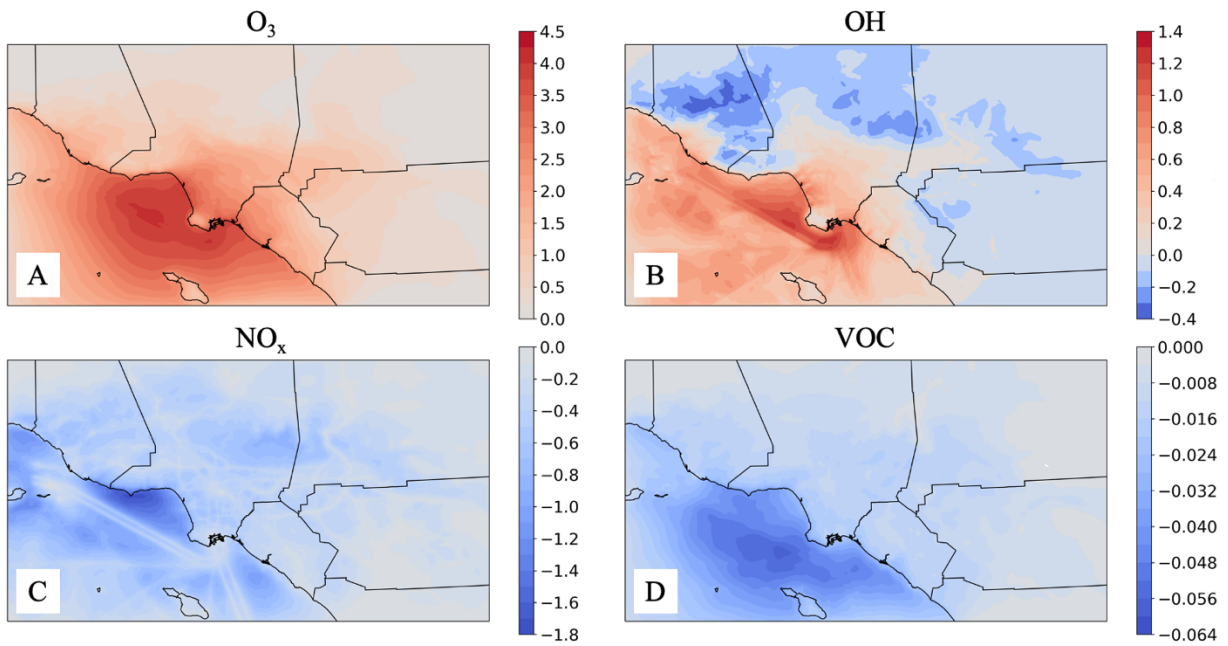

56  
57  
58  
59  
60  
61  
62  
63  
64  
65  
66

Figure S11: Percent change in average predicted A)  $\text{O}_3$ , B) OH, C)  $\text{NO}_x$ , D) VOC concentrations caused by removing sea spray emissions.

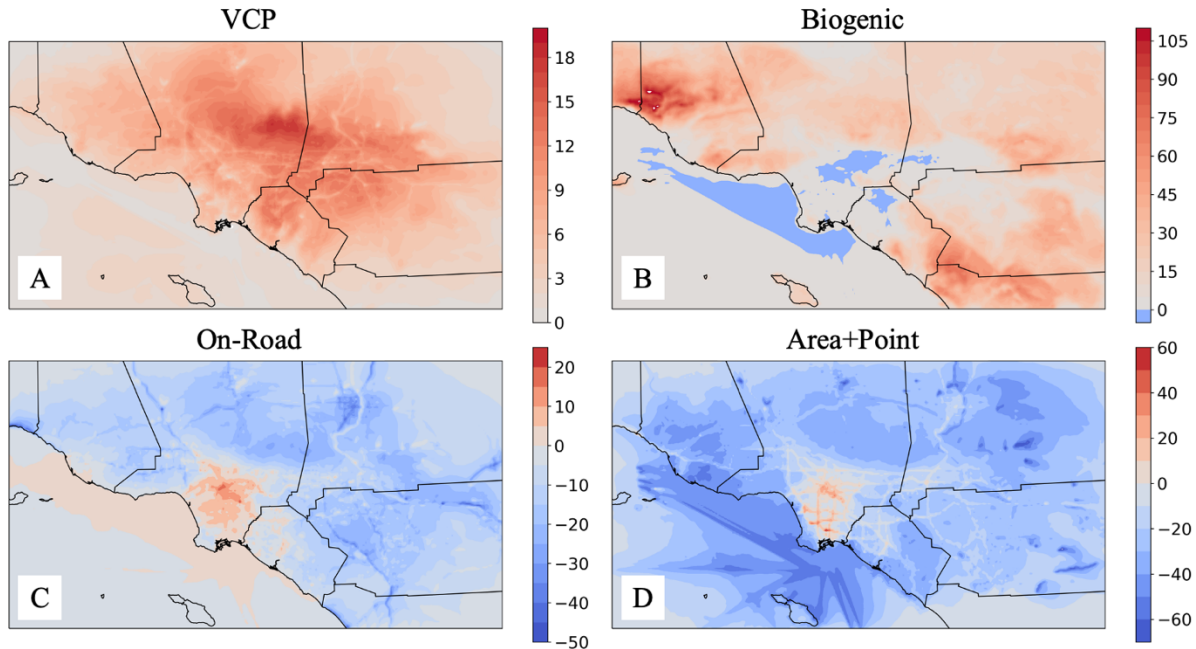

67  
68  
69  
70  
71

Figure S12: Percent change in average predicted OH concentration caused by removing each emission source: A) VCP emissions B) biogenic emissions C) on-road vehicle emissions D) area+point emissions.

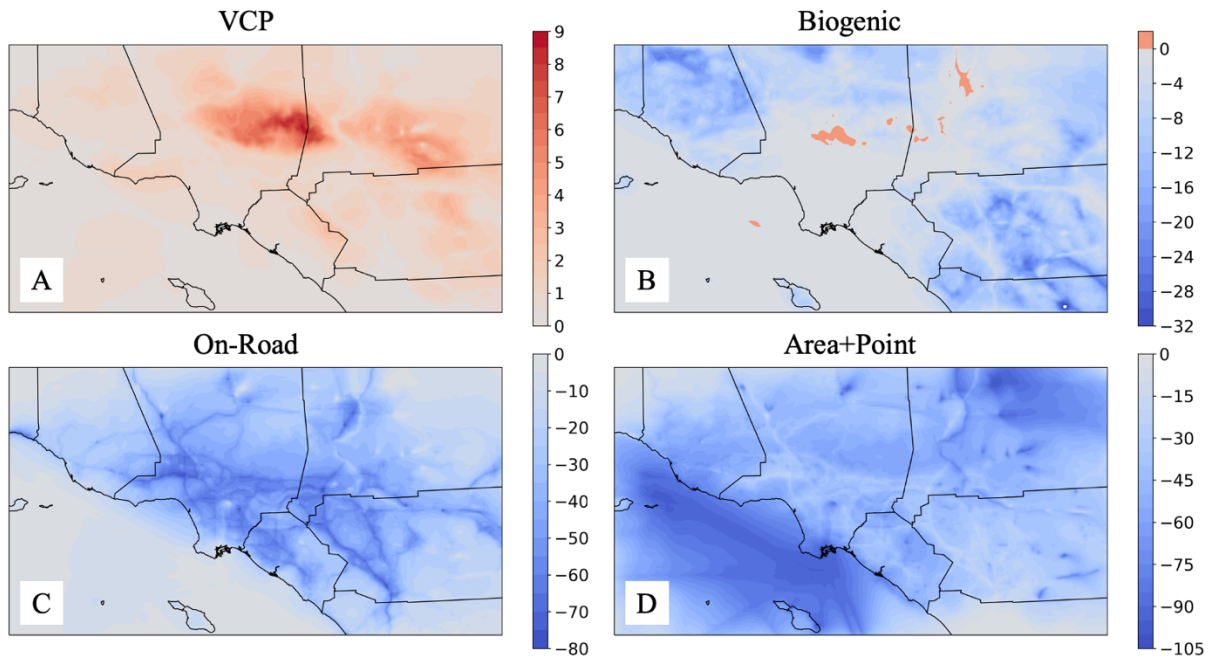

72  
73  
74  
75  
76

Figure S13: Percent change in average predicted NO<sub>x</sub> concentration caused by removing each emission source: A) VCP emissions B) biogenic emissions C) on-road vehicle emissions D) area+point emissions.

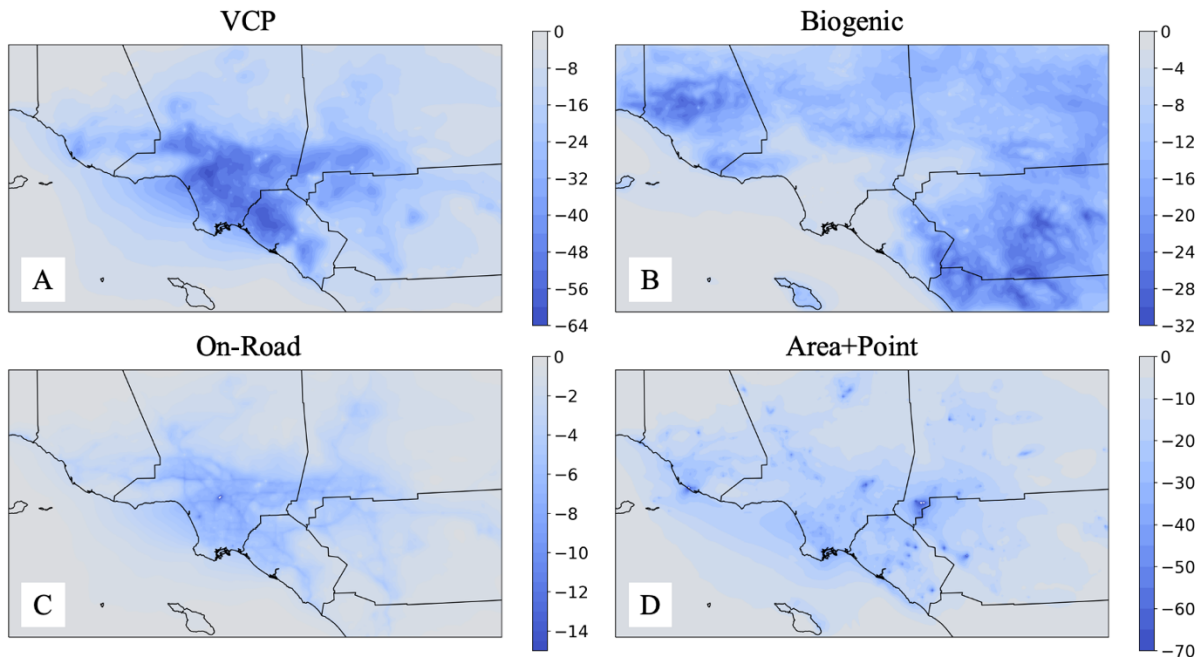

77  
78  
79  
80  
81  
82

Figure S14: Percent change in average predicted VOC concentration caused by removing each emission source: A) VCP emissions B) biogenic emissions C) on-road vehicle emissions D) area+point emissions.

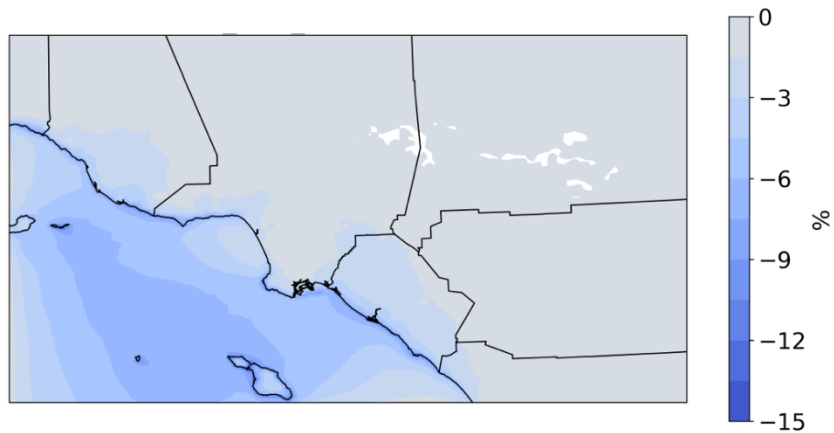

83  
84  
85  
86

Figure S15: Percent change in average predicted PM<sub>2.5</sub> concentration caused by removing sea spray emissions.

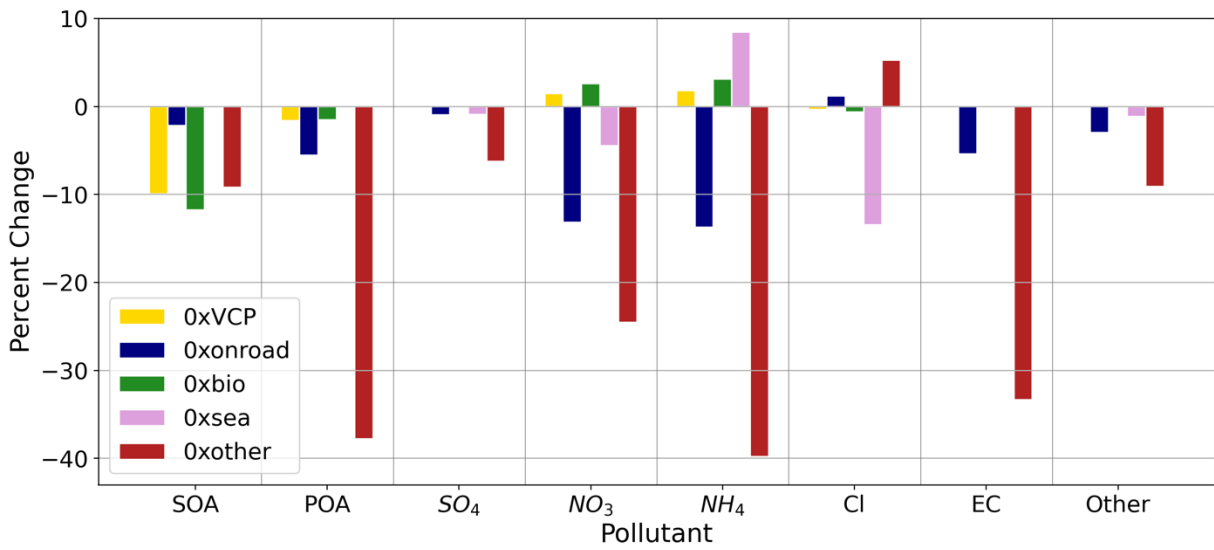

87  
 88 Figure S16: Percent change of PM<sub>2.5</sub> components averaged over the LA domain when each  
 89 emission source is removed.  
 90  
 91  
 92  
 93  
 94  
 95  
 96  
 97  
 98  
 99  
 100  
 101  
 102  
 103  
 104



105

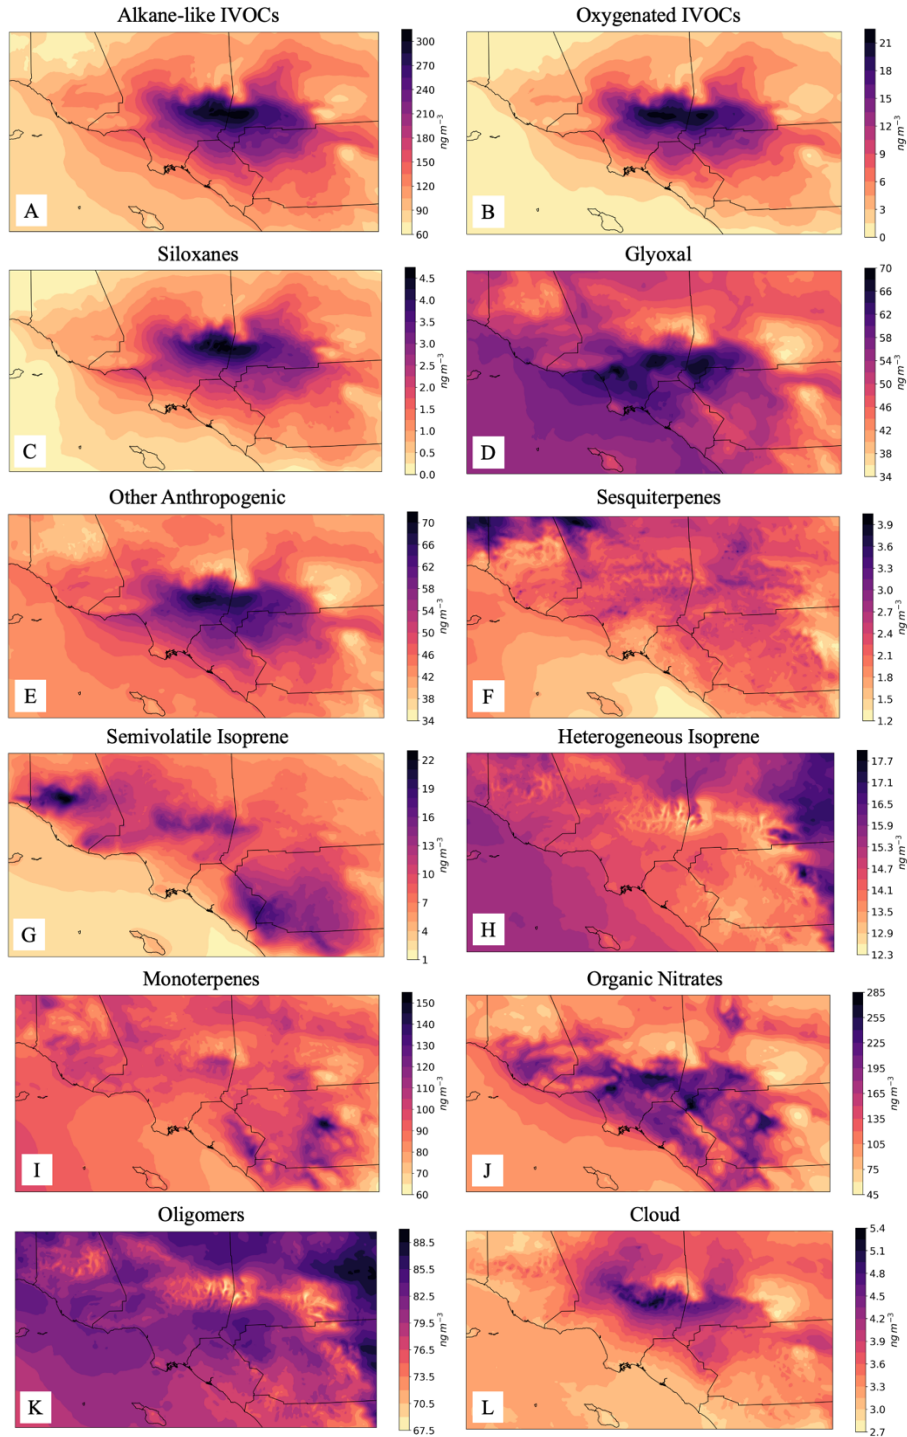

106

107

108

109

110

111

112

113

114

Figure S17: Time-averaged (April 1–30, 2020) CMAQ predicted concentrations ( $\text{ng m}^{-3}$ ) of SOA components derived from: A) alkane-like IVOCs, B) oxygenated IVOCs, C) siloxanes, D) glyoxal, E) other anthropogenic sources, F) sesquiterpenes, G) semivolatile isoprene, H) heterogeneous isoprene, I) monoterpenes, J) organic nitrates, K) oligomers, and L) clouds. The star is located on Pasadena.

115  
116

Table S1: Statistical analysis of daily-averaged WRF predictions compared to EPA AQS monitoring site data.

|                      | Temperature | Relative Humidity | Wind Speed             | Wind Direction |
|----------------------|-------------|-------------------|------------------------|----------------|
| <b>Observed Mean</b> | 17.19 °C    | 65.7%             | 1.43 m s <sup>-1</sup> | 233.1°         |
| <b>Modeled Mean</b>  | 17.84 °C    | 51.7%             | 2.12 m s <sup>-1</sup> | 194.2°         |
| <b>MB</b>            | 0.65 °C     | -14.0%            | 0.68 m s <sup>-1</sup> | -38.8°         |
| <b>NMB</b>           | 3.80%       | -21.3%            | 47.7%                  | -16.7%         |
| <b>RMSE</b>          | 1.14 °C     | 16.5%             | 0.81 m s <sup>-1</sup> | 57.5°          |
| <b>r<sup>2</sup></b> | 0.97        | 0.81              | 0.08                   | 0.26           |

117  
118  
119  
120

Table S2: Statistical analysis of daily-averaged CMAQ predictions in the LA domain compared to EPA AQS monitoring site data.

|                      | O <sub>3</sub> | CO        | NO <sub>x</sub> | SO <sub>2</sub> | PM <sub>2.5</sub>        |
|----------------------|----------------|-----------|-----------------|-----------------|--------------------------|
| <b>Observed Mean</b> | 33.76 ppb      | 228.8 ppb | 12.4 ppb        | 195.3 ppt       | 9.11 µg m <sup>-3</sup>  |
| <b>Modeled Mean</b>  | 37.19 ppb      | 139.1 ppb | 4.72 ppb        | 91.9 ppt        | 6.92 µg m <sup>-3</sup>  |
| <b>MB</b>            | 3.43 ppb       | -89.8 ppb | -7.65 ppb       | -103.4 ppt      | -2.19 µg m <sup>-3</sup> |
| <b>NMB</b>           | 10.2%          | -39.2%    | -61.9%          | -52.9%          | -24.0 %                  |
| <b>RMSE</b>          | 6.21 ppb       | 112.8 ppb | 11.3 ppb        | 120.7 ppt       | 3.74 µg m <sup>-3</sup>  |
| <b>r<sup>2</sup></b> | 0.30           | 0.36      | 0.15            | 0.47            | 0.82                     |

121  
122  
123  
124

Table S3: Statistical analysis of daily-averaged CMAQ predictions in Pasadena compared to Caltech AMS data.

|                                      | Observed Mean            | Modeled Mean             | MB                        | NMB    | RMSE                     | r <sup>2</sup> |
|--------------------------------------|--------------------------|--------------------------|---------------------------|--------|--------------------------|----------------|
| <b>PM<sub>1</sub></b>                | 6.395 µg m <sup>-3</sup> | 3.258 µg m <sup>-3</sup> | -3.14 µg m <sup>-3</sup>  | -49.1% | -                        | -              |
| <b>PM<sub>1</sub> SO<sub>4</sub></b> | 0.953 µg m <sup>-3</sup> | 0.754 µg m <sup>-3</sup> | -0.199 µg m <sup>-3</sup> | -20.8% | 0.419 µg m <sup>-3</sup> | 0.79           |
| <b>PM<sub>1</sub> NO<sub>3</sub></b> | 0.696 µg m <sup>-3</sup> | 0.600 µg m <sup>-3</sup> | -0.096 µg m <sup>-3</sup> | -13.8% | 0.735 µg m <sup>-3</sup> | 0.045          |
| <b>PM<sub>1</sub> NH<sub>4</sub></b> | 0.475 µg m <sup>-3</sup> | 0.125 µg m <sup>-3</sup> | -0.350 µg m <sup>-3</sup> | -73.5% | 0.519 µg m <sup>-3</sup> | 0.0            |
| <b>PM<sub>1</sub> Cl</b>             | 0.060 µg m <sup>-3</sup> | 0.013 µg m <sup>-3</sup> | -0.047 µg m <sup>-3</sup> | -77.8% | 0.063 µg m <sup>-3</sup> | 0.19           |
| <b>PM<sub>1</sub> OM</b>             | 4.211 µg m <sup>-3</sup> | 1.556 µg m <sup>-3</sup> | -2.66 µg m <sup>-3</sup>  | -63.0% | -                        | -              |
| <b>PM<sub>1</sub> POM</b>            | 0.668 µg m <sup>-3</sup> | 0.767 µg m <sup>-3</sup> | -0.099 µg m <sup>-3</sup> | -14.8% | -                        | -              |
| <b>PM<sub>1</sub> SOM</b>            | 2.502 µg m <sup>-3</sup> | 0.789 µg m <sup>-3</sup> | -1.713 µg m <sup>-3</sup> | -68.5% | -                        | -              |

125

126  
127

Table S4: Statistical analysis of daily-averaged CMAQ predictions in Pasadena compared to CITAQS data.

|                   | Observed Mean            | Modeled Mean             | MB                       | NMB    | RMSE                    | r <sup>2</sup> |
|-------------------|--------------------------|--------------------------|--------------------------|--------|-------------------------|----------------|
| O <sub>3</sub>    | 35.6 ppb                 | 35.9 ppb                 | 0.33 ppb                 | 0.94%  | 4.49 ppb                | 0.56           |
| CO                | 232 ppb                  | 169 ppb                  | -63.0 ppb                | -27.2% | 72.0 ppb                | 0.72           |
| SO <sub>2</sub>   | 0.077 ppb                | 0.158 ppb                | 0.081 ppb                | 105%   | 0.112 ppb               | 0.39           |
| NO                | 0.762 ppb                | 0.579 ppb                | -0.183 ppb               | -24.0% | 0.524 ppb               | 0.26           |
| NO <sub>2</sub>   | 8.18 ppb                 | 4.99 ppb                 | -3.19 ppb                | -39.0% | 3.84 ppb                | 0.45           |
| NO <sub>x</sub>   | 8.20 ppb                 | 5.57 ppb                 | -2.63 ppb                | -32.1% | 3.80 ppb                | 0.21           |
| PM <sub>2.5</sub> | 9.10 µg m <sup>-3</sup>  | 7.91 µg m <sup>-3</sup>  | -1.20 µg m <sup>-3</sup> | -13.1% | 3.28 µg m <sup>-3</sup> | 0.71           |
| PM <sub>10</sub>  | 19.85 µg m <sup>-3</sup> | 23.06 µg m <sup>-3</sup> | 3.20 µg m <sup>-3</sup>  | 16.1%  | 5.65 µg m <sup>-3</sup> | 0.80           |
| Temperature       | 18.6 °C                  | 18.4 °C                  | -0.25 °C                 | -1.34% | 1.14 °C                 | 0.95           |

128  
129  
130  
131  
132  
133

Table S6: Mass concentration change (ng m<sup>-3</sup>) of SOA components in Pasadena averaged April 1–30, 2020 when each emission source is removed.

| ng m <sup>-3</sup>  | VCP     | On-Road | Biogenic | Sea Spray              | Area+Point |
|---------------------|---------|---------|----------|------------------------|------------|
| Alkane-like IVOCs   | -109.74 | -6.91   | -1.39    | 0.21                   | -65.45     |
| Oxygenated IVOCs    | -19.03  | -0.40   | -0.21    | 0.04                   | -0.80      |
| Siloxanes           | -3.21   | -0.04   | -0.08    | 4.6 x 10 <sup>-3</sup> | -0.50      |
| Glyoxal             | -3.31   | -3.75   | -5.05    | -0.22                  | -9.50      |
| Other anthropogenic | -13.70  | -2.90   | -2.67    | 0.29                   | -8.98      |
| Isoprene            | -1.09   | -0.33   | -8.92    | 6.8 x 10 <sup>-3</sup> | -2.25      |
| Monoterpenes        | -9.44   | 1.44    | -18.94   | -0.06                  | -6.58      |
| Sesquiterpenes      | -0.38   | -0.17   | -0.24    | 3.6 x 10 <sup>-4</sup> | -0.98      |
| Organic nitrates    | -60.26  | -17.24  | -107.62  | 0.56                   | -61.57     |
| Oligomers           | -1.75   | -0.57   | -2.26    | 5.0 x 10 <sup>-4</sup> | -1.72      |
| Cloud-processed     | -0.35   | -0.16   | -0.18    | 1.8 x 10 <sup>-3</sup> | -0.60      |

134  
135  
136  
137  
138

### References

139 Lu, Q., Murphy, B. N., Qin, M., Adams, P. J., Zhao, Y., Pye, H. O. T., Efstathiou, C., Allen, C.,  
140 & Robinson, A. L. (2020). Simulation of organic aerosol formation during the CalNex  
141 study: Updated mobile emissions and secondary organic aerosol parameterization for  
142 intermediate-volatility organic compounds. *Atmospheric Chemistry and Physics*, 20(7),  
143 4313–4332. <https://doi.org/10.5194/acp-20-4313-2020>  
144 Pennington, E. A., Seltzer, K. M., Murphy, B. N., Qin, M., Seinfeld, J. H., & Pye, H. O. T.  
145 (2021). Modeling secondary organic aerosol formation from volatile chemical products.  
146 *Atmospheric Chemistry and Physics*, 21(24), 18247–18261. <https://doi.org/10.5194/acp-21-18247-2021>  
147
